# Supplementary material for: Automated LC-MS analysis and data extraction for high-throughput chemistry
Source: Royal Society of Chemistry journal article supplement (doi:10.1039/d3dd00167a), 2023-01-01
Supplement: d3dd00167a2.csv [file d3dd00167a2.csv]

Well	Desired Product SMILES	Limiting Reactant SMILES	InternalSTD SMILES	Byproduct1 SMILES
A1	OCC1=COC(C2=CC(C=CC=C3)=C3N=C2)=N1	BrC1=CC2=CC=CC=C2N=C1	C1(N(CC2=CC=CC=C2)CC3=CC=CC=C3)=CC=CC=C1	OCC1=C(C2=CN=C(C=CC=C3)C3=C2)OC(C4=CC5=C(N=C4)C=CC=C5)=N1
A2	OCC1=COC(C2=CC(C=CC=C3)=C3N=C2)=N1	BrC1=CC2=CC=CC=C2N=C1	C1(N(CC2=CC=CC=C2)CC3=CC=CC=C3)=CC=CC=C1	OCC1=C(C2=CN=C(C=CC=C3)C3=C2)OC(C4=CC5=C(N=C4)C=CC=C5)=N1
A3	OCC1=COC(C2=CC(C=CC=C3)=C3N=C2)=N1	BrC1=CC2=CC=CC=C2N=C1	C1(N(CC2=CC=CC=C2)CC3=CC=CC=C3)=CC=CC=C1	OCC1=C(C2=CN=C(C=CC=C3)C3=C2)OC(C4=CC5=C(N=C4)C=CC=C5)=N1
A4	OCC1=COC(C2=CC(C=CC=C3)=C3N=C2)=N1	BrC1=CC2=CC=CC=C2N=C1	C1(N(CC2=CC=CC=C2)CC3=CC=CC=C3)=CC=CC=C1	OCC1=C(C2=CN=C(C=CC=C3)C3=C2)OC(C4=CC5=C(N=C4)C=CC=C5)=N1
A5	OCC1=COC(C2=CC(C=CC=C3)=C3N=C2)=N1	BrC1=CC2=CC=CC=C2N=C1	C1(N(CC2=CC=CC=C2)CC3=CC=CC=C3)=CC=CC=C1	OCC1=C(C2=CN=C(C=CC=C3)C3=C2)OC(C4=CC5=C(N=C4)C=CC=C5)=N1
A6	OCC1=COC(C2=CC(C=CC=C3)=C3N=C2)=N1	BrC1=CC2=CC=CC=C2N=C1	C1(N(CC2=CC=CC=C2)CC3=CC=CC=C3)=CC=CC=C1	OCC1=C(C2=CN=C(C=CC=C3)C3=C2)OC(C4=CC5=C(N=C4)C=CC=C5)=N1
A7	OCC1=COC(C2=CC(C=CC=C3)=C3N=C2)=N1	BrC1=CC2=CC=CC=C2N=C1	C1(N(CC2=CC=CC=C2)CC3=CC=CC=C3)=CC=CC=C1	OCC1=C(C2=CN=C(C=CC=C3)C3=C2)OC(C4=CC5=C(N=C4)C=CC=C5)=N1
A8	OCC1=COC(C2=CC(C=CC=C3)=C3N=C2)=N1	BrC1=CC2=CC=CC=C2N=C1	C1(N(CC2=CC=CC=C2)CC3=CC=CC=C3)=CC=CC=C1	OCC1=C(C2=CN=C(C=CC=C3)C3=C2)OC(C4=CC5=C(N=C4)C=CC=C5)=N1
A9	OCC1=COC(C2=CC(C=CC=C3)=C3N=C2)=N1	BrC1=CC2=CC=CC=C2N=C1	C1(N(CC2=CC=CC=C2)CC3=CC=CC=C3)=CC=CC=C1	OCC1=C(C2=CN=C(C=CC=C3)C3=C2)OC(C4=CC5=C(N=C4)C=CC=C5)=N1
A10	OCC1=COC(C2=CC(C=CC=C3)=C3N=C2)=N1	BrC1=CC2=CC=CC=C2N=C1	C1(N(CC2=CC=CC=C2)CC3=CC=CC=C3)=CC=CC=C1	OCC1=C(C2=CN=C(C=CC=C3)C3=C2)OC(C4=CC5=C(N=C4)C=CC=C5)=N1
A11	OCC1=COC(C2=CC(C=CC=C3)=C3N=C2)=N1	BrC1=CC2=CC=CC=C2N=C1	C1(N(CC2=CC=CC=C2)CC3=CC=CC=C3)=CC=CC=C1	OCC1=C(C2=CN=C(C=CC=C3)C3=C2)OC(C4=CC5=C(N=C4)C=CC=C5)=N1
A12	OCC1=COC(C2=CC(C=CC=C3)=C3N=C2)=N1	BrC1=CC2=CC=CC=C2N=C1	C1(N(CC2=CC=CC=C2)CC3=CC=CC=C3)=CC=CC=C1	OCC1=C(C2=CN=C(C=CC=C3)C3=C2)OC(C4=CC5=C(N=C4)C=CC=C5)=N1
B1	OCC1=COC(C2=CC(C=CC=C3)=C3N=C2)=N1	BrC1=CC2=CC=CC=C2N=C1	C1(N(CC2=CC=CC=C2)CC3=CC=CC=C3)=CC=CC=C1	OCC1=C(C2=CN=C(C=CC=C3)C3=C2)OC(C4=CC5=C(N=C4)C=CC=C5)=N1
B2	OCC1=COC(C2=CC(C=CC=C3)=C3N=C2)=N1	BrC1=CC2=CC=CC=C2N=C1	C1(N(CC2=CC=CC=C2)CC3=CC=CC=C3)=CC=CC=C1	OCC1=C(C2=CN=C(C=CC=C3)C3=C2)OC(C4=CC5=C(N=C4)C=CC=C5)=N1
B3	OCC1=COC(C2=CC(C=CC=C3)=C3N=C2)=N1	BrC1=CC2=CC=CC=C2N=C1	C1(N(CC2=CC=CC=C2)CC3=CC=CC=C3)=CC=CC=C1	OCC1=C(C2=CN=C(C=CC=C3)C3=C2)OC(C4=CC5=C(N=C4)C=CC=C5)=N1
B4	OCC1=COC(C2=CC(C=CC=C3)=C3N=C2)=N1	BrC1=CC2=CC=CC=C2N=C1	C1(N(CC2=CC=CC=C2)CC3=CC=CC=C3)=CC=CC=C1	OCC1=C(C2=CN=C(C=CC=C3)C3=C2)OC(C4=CC5=C(N=C4)C=CC=C5)=N1
B5	OCC1=COC(C2=CC(C=CC=C3)=C3N=C2)=N1	BrC1=CC2=CC=CC=C2N=C1	C1(N(CC2=CC=CC=C2)CC3=CC=CC=C3)=CC=CC=C1	OCC1=C(C2=CN=C(C=CC=C3)C3=C2)OC(C4=CC5=C(N=C4)C=CC=C5)=N1
B6	OCC1=COC(C2=CC(C=CC=C3)=C3N=C2)=N1	BrC1=CC2=CC=CC=C2N=C1	C1(N(CC2=CC=CC=C2)CC3=CC=CC=C3)=CC=CC=C1	OCC1=C(C2=CN=C(C=CC=C3)C3=C2)OC(C4=CC5=C(N=C4)C=CC=C5)=N1
B7	OCC1=COC(C2=CC(C=CC=C3)=C3N=C2)=N1	BrC1=CC2=CC=CC=C2N=C1	C1(N(CC2=CC=CC=C2)CC3=CC=CC=C3)=CC=CC=C1	OCC1=C(C2=CN=C(C=CC=C3)C3=C2)OC(C4=CC5=C(N=C4)C=CC=C5)=N1
B8	OCC1=COC(C2=CC(C=CC=C3)=C3N=C2)=N1	BrC1=CC2=CC=CC=C2N=C1	C1(N(CC2=CC=CC=C2)CC3=CC=CC=C3)=CC=CC=C1	OCC1=C(C2=CN=C(C=CC=C3)C3=C2)OC(C4=CC5=C(N=C4)C=CC=C5)=N1
B9	OCC1=COC(C2=CC(C=CC=C3)=C3N=C2)=N1	BrC1=CC2=CC=CC=C2N=C1	C1(N(CC2=CC=CC=C2)CC3=CC=CC=C3)=CC=CC=C1	OCC1=C(C2=CN=C(C=CC=C3)C3=C2)OC(C4=CC5=C(N=C4)C=CC=C5)=N1
B10	OCC1=COC(C2=CC(C=CC=C3)=C3N=C2)=N1	BrC1=CC2=CC=CC=C2N=C1	C1(N(CC2=CC=CC=C2)CC3=CC=CC=C3)=CC=CC=C1	OCC1=C(C2=CN=C(C=CC=C3)C3=C2)OC(C4=CC5=C(N=C4)C=CC=C5)=N1
B11	OCC1=COC(C2=CC(C=CC=C3)=C3N=C2)=N1	BrC1=CC2=CC=CC=C2N=C1	C1(N(CC2=CC=CC=C2)CC3=CC=CC=C3)=CC=CC=C1	OCC1=C(C2=CN=C(C=CC=C3)C3=C2)OC(C4=CC5=C(N=C4)C=CC=C5)=N1
B12	OCC1=COC(C2=CC(C=CC=C3)=C3N=C2)=N1	BrC1=CC2=CC=CC=C2N=C1	C1(N(CC2=CC=CC=C2)CC3=CC=CC=C3)=CC=CC=C1	OCC1=C(C2=CN=C(C=CC=C3)C3=C2)OC(C4=CC5=C(N=C4)C=CC=C5)=N1
C1	OCC1=COC(C2=CC(C=CC=C3)=C3N=C2)=N1	BrC1=CC2=CC=CC=C2N=C1	C1(N(CC2=CC=CC=C2)CC3=CC=CC=C3)=CC=CC=C1	OCC1=C(C2=CN=C(C=CC=C3)C3=C2)OC(C4=CC5=C(N=C4)C=CC=C5)=N1
C2	OCC1=COC(C2=CC(C=CC=C3)=C3N=C2)=N1	BrC1=CC2=CC=CC=C2N=C1	C1(N(CC2=CC=CC=C2)CC3=CC=CC=C3)=CC=CC=C1	OCC1=C(C2=CN=C(C=CC=C3)C3=C2)OC(C4=CC5=C(N=C4)C=CC=C5)=N1
C3	OCC1=COC(C2=CC(C=CC=C3)=C3N=C2)=N1	BrC1=CC2=CC=CC=C2N=C1	C1(N(CC2=CC=CC=C2)CC3=CC=CC=C3)=CC=CC=C1	OCC1=C(C2=CN=C(C=CC=C3)C3=C2)OC(C4=CC5=C(N=C4)C=CC=C5)=N1
C4	OCC1=COC(C2=CC(C=CC=C3)=C3N=C2)=N1	BrC1=CC2=CC=CC=C2N=C1	C1(N(CC2=CC=CC=C2)CC3=CC=CC=C3)=CC=CC=C1	OCC1=C(C2=CN=C(C=CC=C3)C3=C2)OC(C4=CC5=C(N=C4)C=CC=C5)=N1
C5	OCC1=COC(C2=CC(C=CC=C3)=C3N=C2)=N1	BrC1=CC2=CC=CC=C2N=C1	C1(N(CC2=CC=CC=C2)CC3=CC=CC=C3)=CC=CC=C1	OCC1=C(C2=CN=C(C=CC=C3)C3=C2)OC(C4=CC5=C(N=C4)C=CC=C5)=N1
C6	OCC1=COC(C2=CC(C=CC=C3)=C3N=C2)=N1	BrC1=CC2=CC=CC=C2N=C1	C1(N(CC2=CC=CC=C2)CC3=CC=CC=C3)=CC=CC=C1	OCC1=C(C2=CN=C(C=CC=C3)C3=C2)OC(C4=CC5=C(N=C4)C=CC=C5)=N1
C7	OCC1=COC(C2=CC(C=CC=C3)=C3N=C2)=N1	BrC1=CC2=CC=CC=C2N=C1	C1(N(CC2=CC=CC=C2)CC3=CC=CC=C3)=CC=CC=C1	OCC1=C(C2=CN=C(C=CC=C3)C3=C2)OC(C4=CC5=C(N=C4)C=CC=C5)=N1
C8	OCC1=COC(C2=CC(C=CC=C3)=C3N=C2)=N1	BrC1=CC2=CC=CC=C2N=C1	C1(N(CC2=CC=CC=C2)CC3=CC=CC=C3)=CC=CC=C1	OCC1=C(C2=CN=C(C=CC=C3)C3=C2)OC(C4=CC5=C(N=C4)C=CC=C5)=N1
C9	OCC1=COC(C2=CC(C=CC=C3)=C3N=C2)=N1	BrC1=CC2=CC=CC=C2N=C1	C1(N(CC2=CC=CC=C2)CC3=CC=CC=C3)=CC=CC=C1	OCC1=C(C2=CN=C(C=CC=C3)C3=C2)OC(C4=CC5=C(N=C4)C=CC=C5)=N1
C10	OCC1=COC(C2=CC(C=CC=C3)=C3N=C2)=N1	BrC1=CC2=CC=CC=C2N=C1	C1(N(CC2=CC=CC=C2)CC3=CC=CC=C3)=CC=CC=C1	OCC1=C(C2=CN=C(C=CC=C3)C3=C2)OC(C4=CC5=C(N=C4)C=CC=C5)=N1
C11	OCC1=COC(C2=CC(C=CC=C3)=C3N=C2)=N1	BrC1=CC2=CC=CC=C2N=C1	C1(N(CC2=CC=CC=C2)CC3=CC=CC=C3)=CC=CC=C1	OCC1=C(C2=CN=C(C=CC=C3)C3=C2)OC(C4=CC5=C(N=C4)C=CC=C5)=N1
C12	OCC1=COC(C2=CC(C=CC=C3)=C3N=C2)=N1	BrC1=CC2=CC=CC=C2N=C1	C1(N(CC2=CC=CC=C2)CC3=CC=CC=C3)=CC=CC=C1	OCC1=C(C2=CN=C(C=CC=C3)C3=C2)OC(C4=CC5=C(N=C4)C=CC=C5)=N1
D1	OCC1=COC(C2=CC(C=CC=C3)=C3N=C2)=N1	BrC1=CC2=CC=CC=C2N=C1	C1(N(CC2=CC=CC=C2)CC3=CC=CC=C3)=CC=CC=C1	OCC1=C(C2=CN=C(C=CC=C3)C3=C2)OC(C4=CC5=C(N=C4)C=CC=C5)=N1
D2	OCC1=COC(C2=CC(C=CC=C3)=C3N=C2)=N1	BrC1=CC2=CC=CC=C2N=C1	C1(N(CC2=CC=CC=C2)CC3=CC=CC=C3)=CC=CC=C1	OCC1=C(C2=CN=C(C=CC=C3)C3=C2)OC(C4=CC5=C(N=C4)C=CC=C5)=N1
D3	OCC1=COC(C2=CC(C=CC=C3)=C3N=C2)=N1	BrC1=CC2=CC=CC=C2N=C1	C1(N(CC2=CC=CC=C2)CC3=CC=CC=C3)=CC=CC=C1	OCC1=C(C2=CN=C(C=CC=C3)C3=C2)OC(C4=CC5=C(N=C4)C=CC=C5)=N1
D4	OCC1=COC(C2=CC(C=CC=C3)=C3N=C2)=N1	BrC1=CC2=CC=CC=C2N=C1	C1(N(CC2=CC=CC=C2)CC3=CC=CC=C3)=CC=CC=C1	OCC1=C(C2=CN=C(C=CC=C3)C3=C2)OC(C4=CC5=C(N=C4)C=CC=C5)=N1
D5	OCC1=COC(C2=CC(C=CC=C3)=C3N=C2)=N1	BrC1=CC2=CC=CC=C2N=C1	C1(N(CC2=CC=CC=C2)CC3=CC=CC=C3)=CC=CC=C1	OCC1=C(C2=CN=C(C=CC=C3)C3=C2)OC(C4=CC5=C(N=C4)C=CC=C5)=N1
D6	OCC1=COC(C2=CC(C=CC=C3)=C3N=C2)=N1	BrC1=CC2=CC=CC=C2N=C1	C1(N(CC2=CC=CC=C2)CC3=CC=CC=C3)=CC=CC=C1	OCC1=C(C2=CN=C(C=CC=C3)C3=C2)OC(C4=CC5=C(N=C4)C=CC=C5)=N1
D7	OCC1=COC(C2=CC(C=CC=C3)=C3N=C2)=N1	BrC1=CC2=CC=CC=C2N=C1	C1(N(CC2=CC=CC=C2)CC3=CC=CC=C3)=CC=CC=C1	OCC1=C(C2=CN=C(C=CC=C3)C3=C2)OC(C4=CC5=C(N=C4)C=CC=C5)=N1
D8	OCC1=COC(C2=CC(C=CC=C3)=C3N=C2)=N1	BrC1=CC2=CC=CC=C2N=C1	C1(N(CC2=CC=CC=C2)CC3=CC=CC=C3)=CC=CC=C1	OCC1=C(C2=CN=C(C=CC=C3)C3=C2)OC(C4=CC5=C(N=C4)C=CC=C5)=N1
D9	OCC1=COC(C2=CC(C=CC=C3)=C3N=C2)=N1	BrC1=CC2=CC=CC=C2N=C1	C1(N(CC2=CC=CC=C2)CC3=CC=CC=C3)=CC=CC=C1	OCC1=C(C2=CN=C(C=CC=C3)C3=C2)OC(C4=CC5=C(N=C4)C=CC=C5)=N1
D10	OCC1=COC(C2=CC(C=CC=C3)=C3N=C2)=N1	BrC1=CC2=CC=CC=C2N=C1	C1(N(CC2=CC=CC=C2)CC3=CC=CC=C3)=CC=CC=C1	OCC1=C(C2=CN=C(C=CC=C3)C3=C2)OC(C4=CC5=C(N=C4)C=CC=C5)=N1
D11	OCC1=COC(C2=CC(C=CC=C3)=C3N=C2)=N1	BrC1=CC2=CC=CC=C2N=C1	C1(N(CC2=CC=CC=C2)CC3=CC=CC=C3)=CC=CC=C1	OCC1=C(C2=CN=C(C=CC=C3)C3=C2)OC(C4=CC5=C(N=C4)C=CC=C5)=N1
D12	OCC1=COC(C2=CC(C=CC=C3)=C3N=C2)=N1	BrC1=CC2=CC=CC=C2N=C1	C1(N(CC2=CC=CC=C2)CC3=CC=CC=C3)=CC=CC=C1	OCC1=C(C2=CN=C(C=CC=C3)C3=C2)OC(C4=CC5=C(N=C4)C=CC=C5)=N1
